# Supplementary material for: Risk prediction score for clinical outcome in atrial fibrillation and stable coronary artery disease
Source: PubMed Central journal article supplement — Open Heart. 2023 May 12;10(1):e002292. doi: 10.1136/openhrt-2023-002292 (PMC10186465; doi:10.1136/openhrt-2023-002292), 2023-05-12
Supplement: openhrt-2023-002292supp001.pdf [file openhrt-2023-002292supp001.pdf]

## **SUPPLEMENTAL MATERIAL ONLINE CONTENTS**

### **for Risk Prediction Score for Clinical Outcome in Atrial Fibrillation and Stable Coronary Artery Disease**

**Authors: Ishii et al.**

#### **TABLE OF CONTENTS**

##### **Supplementary Table 1:**

Variables available for the risk prediction model in the AFIRE study

##### **Supplementary Table 2:**

Discrimination and calibration of the random survival forest and Cox proportional hazard models

##### **Supplementary Table 3:**

Discrimination and improvement indices for the new risk score compared to conventional risk scores

##### **Supplementary Figure 1:**

Calibration plot of the new risk score for net adverse clinical events.

##### **Supplementary Figure 2:**

Receiver operating characteristic curve for the new and conventional risk scores.

**Supplementary Table 1. Variables available for the risk prediction model in AFIRE study**

| Variable Domain            | Individual Variables                                                                                                                                                                                                                                                                                                                                                                                                                                                                                                                                        |
|----------------------------|-------------------------------------------------------------------------------------------------------------------------------------------------------------------------------------------------------------------------------------------------------------------------------------------------------------------------------------------------------------------------------------------------------------------------------------------------------------------------------------------------------------------------------------------------------------|
| Demographic                | <b>Age, sex, smoking history, alcohol drinking history</b>                                                                                                                                                                                                                                                                                                                                                                                                                                                                                                  |
| Physiological Findings     | <b>Height, body weight, body mass index, systolic blood pressure, diastolic blood pressure</b>                                                                                                                                                                                                                                                                                                                                                                                                                                                              |
| Clinical / Medical History | <b>Type of atrial fibrillation, allocated arm, History of hypertension, diabetes mellitus, dyslipidaemia, angina pectoris, heart failure, liver dysfunction, renal dysfunction, haemorrhagic diathesis, stroke, transient ischemic attack, myocardial infarction, aortic aneurysm, systemic embolism, deep venous thrombosis, pulmonary embolism, peripheral artery disease, other ischemic disorder, bleeding complication, percutaneous coronary intervention (PCI), coronary artery bypass grafting (CABG), and interventions other than PCI or CABG</b> |

---

|                                |                                                                                                                                                                                                                                                                                                        |
|--------------------------------|--------------------------------------------------------------------------------------------------------------------------------------------------------------------------------------------------------------------------------------------------------------------------------------------------------|
| Laboratory                     | <b>Creatinine clearance</b>                                                                                                                                                                                                                                                                            |
| Baseline Medication            | <b>Rivaroxaban, warfarin, dabigatran, apixaban, edoxaban, other anti-coagulants, aspirin, clopidogrel, prasugrel, ticlopidine, ticagrelor, P2Y12 inhibitor, other antiplatelet drugs, dual antiplatelet therapy, dose of rivaroxaban, proton pump inhibitor, non-steroidal anti-inflammatory drugs</b> |
| Conventional Risk Score        | CHADS <sub>2</sub> , CHA <sub>2</sub> DS <sub>2</sub> -VASc, and HAS-BLED                                                                                                                                                                                                                              |
| Coronary Angiographic Findings | <b>Bare metal stent, drug eluting stent, type of stent such as Cypher, TAXUS, Endeavor, Xience, Promus, Nobori, or other, culprit lesion of PCI according to AHA classification, date of PCI</b>                                                                                                       |

---

Bolded candidate variables had <10% missing data and were used to develop risk prediction models.

**Supplementary Table 2. Discrimination and calibration of the random survival forest and****Cox proportional hazard models**

| Variables                     | C-index | Brier score |
|-------------------------------|---------|-------------|
| Random survival forest model  |         |             |
| Development cohort            | 0.706   | 0.081       |
| Validation cohort             | 0.667   | 0.080       |
| Cox proportional hazard model |         |             |
| Development cohort            | 0.680   | 0.079       |
| Validation cohort             | 0.650   | 0.081       |

**Supplementary Table 3. Discrimination and improvement indices for the new risk score compared to conventional risk scores**

|                                        | Category free-NRI (95% CI), p-value | Categorical NRI (95% CI), p-value | IDI (95% CI), p-value         |
|----------------------------------------|-------------------------------------|-----------------------------------|-------------------------------|
| CHADS <sub>2</sub>                     | 0.429 (0.232, 0.625), p<0.001       | 0.130 (0.032, 0.228), p=0.010     | 0.029 (0.018,0.041), p<0.001  |
| CHA <sub>2</sub> DS <sub>2</sub> -VASc | 0.491 (0.297, 0.686), p<0.001       | 0.143 (0.043, 0.242), p=0.005     | 0.031 (0.019, 0.042), p<0.001 |
| HAS-BLED                               | 0.509 (0.318, 0.701), p<0.001       | 0.215 (0.088, 0.341), p<0.001     | 0.035 (0.021, 0.048), p<0.001 |

AUC, area under the curve; CI, confidence interval; NRI, net reclassification improvement; IDI, integrated discrimination improvement.

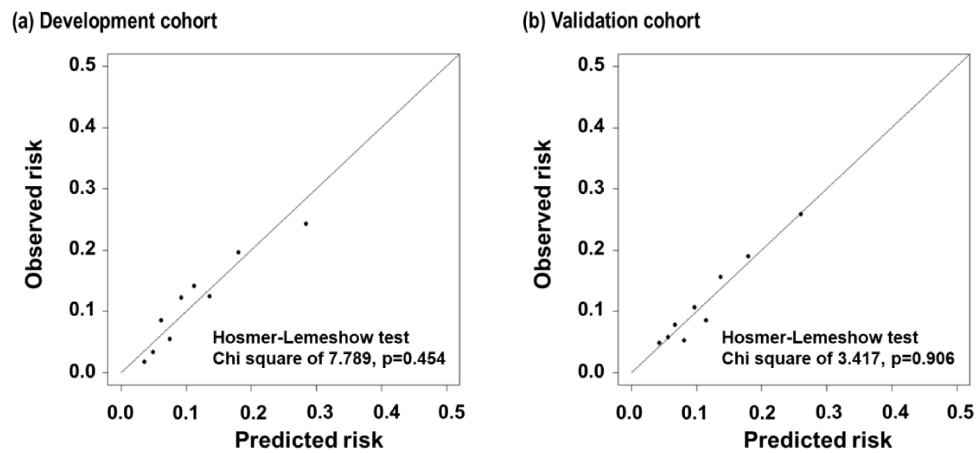

**Supplementary Figure 1. Calibration plot of the new risk score for net adverse clinical events.**

Calibration plot of the new machine-learning-based risk score using variables such as age, body mass index, sex, systolic blood pressure, alcohol consumption, creatinine clearance, heart failure, diabetes mellitus, antithrombotic regimen, and type of atrial fibrillation in the development (a) and validation (b) cohorts.

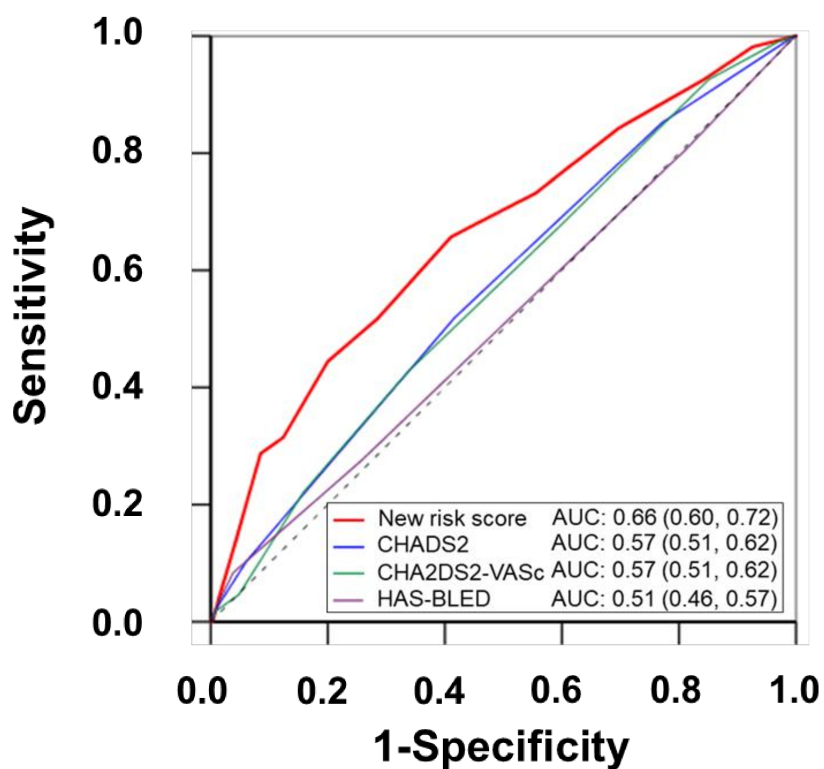

**Supplementary Figure 2. Receiver operating characteristic curve for the new and conventional risk scores**

Area under the receiver operating characteristic curve of the new machine-learning-based risk score and conventional risk scores such as the CHADS<sub>2</sub>, CHA<sub>2</sub>DS<sub>2</sub>-VASc, and HAS-BLED scores.
